# Supplementary material
Source: Springer Nature journal article supplement (https://www.springermedizin.de/resource/supplementary/12936_2007_371_MOESM2_ESM.pdf/9547660)

**A**

| Lane | 1 | 2 | 3 | 4 | 5 | 6 |
|------|---|---|---|---|---|---|
| I/U  | U | U | I | I | I | I |
| Tryp | + | - | + | - | + | - |

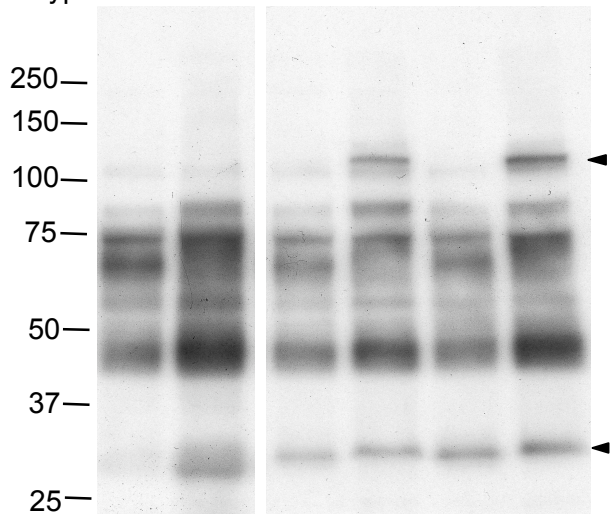**B**

| Lane | 1 | 2 | 3 | 4 | 5 | 6 |
|------|---|---|---|---|---|---|
| I/U  | U | U | I | I | I | I |
| Tryp | + | - | + | - | + | - |

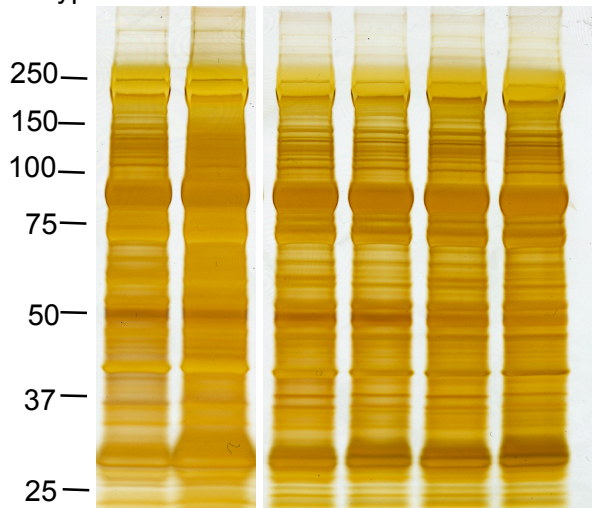

Supplement: MOESM2 [file 9547660]
